# Supplementary material for: Competition among physical, chemical, and hybrid gelation mechanisms in biopolymers
Source: Royal Society of Chemistry journal article supplement (doi:10.1039/d3sm01682j), 2024-01-01
Supplement: d3sm01682j1.pdf [file d3sm01682j1.pdf]

## Supplementary Information

### Competition among physical, chemical, and hybrid gelation mechanisms in biopolymers

Ricky F. López-Santiago,<sup>1</sup> Jorge Delgado,<sup>2</sup> Rolando Castillo<sup>1\*</sup>

<sup>1</sup>Instituto de Física, Universidad Nacional Autónoma de México, P.O. Box 20-364, 01000,  
Mexico City, México.

<sup>2</sup>División de Ciencias e Ingenierías, Campus León, Universidad de Guanajuato,  
León, Guanajuato, México.

---

\* To whom correspondence should be addressed:  
E-mail: [rolandoc@fisica.unam.mx](mailto:rolandoc@fisica.unam.mx)

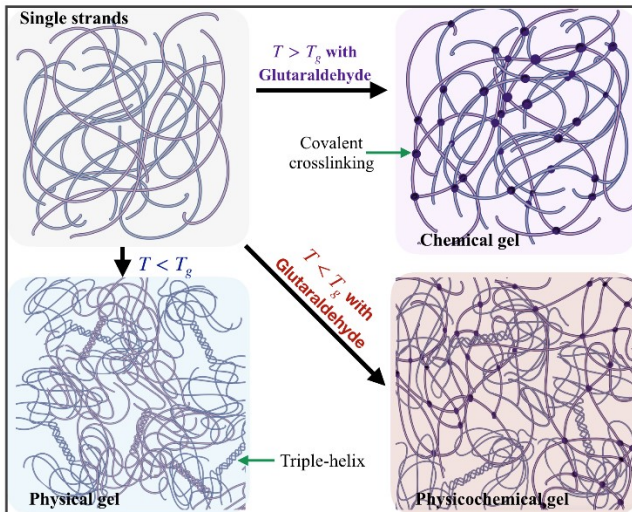

**Figure S11.** Cartoon with three gelatin types: Physical gel, chemical, and physicochemical gels with glutaraldehyde as the crosslinking agent.  $T_g$  is the gelation temperature.

**Estimation of gelation temperature for physical gels.** An example of how  $T_g$  is obtained for gelatin solution at  $C = 16 \text{ Wt } \%$  is presented in Fig. S12a. For temperatures  $\geq 40 \text{ }^\circ\text{C}$ ,  $G'(\omega)$  is proportional to  $\omega^2$  and  $G''(\omega)$  to  $\omega$  over a significant frequency domain, a behavior characteristic of polymer solutions.<sup>1,2</sup> As the temperature is lowered, both  $G'(\omega)$  and  $G''(\omega)$  get close and parallel, and eventually, when the temperature is equal to  $T_g = 36.5 \text{ }^\circ\text{C}$ , both moduli are almost the same in almost four orders of magnitude of the frequency. A *log-log* plot of  $G'(\omega)$  or  $G''(\omega)$  vs.  $\omega$  forms straight lines with the same slope; the system has reached the critical gel. For  $T < T_g$ , the viscoelastic behavior is solid-like. Also, at the gel point,  $\tan(\delta)$  is independent of frequency,  $\tan(\delta) = \tan(n\pi/2)$ , as seen in the inset of Fig. S12b for  $36.5 \text{ }^\circ\text{C}$  where the  $n$  value of Chambon & Winter criteria can be obtained, as well as the of stiffness,  $S$ . In this case,  $n = 0.62$ , which is equal to the results reported by Peyrelasse *et al.*<sup>2</sup> for a concentration range between  $0.17$  and  $0.40 \text{ g cm}^{-3}$ .

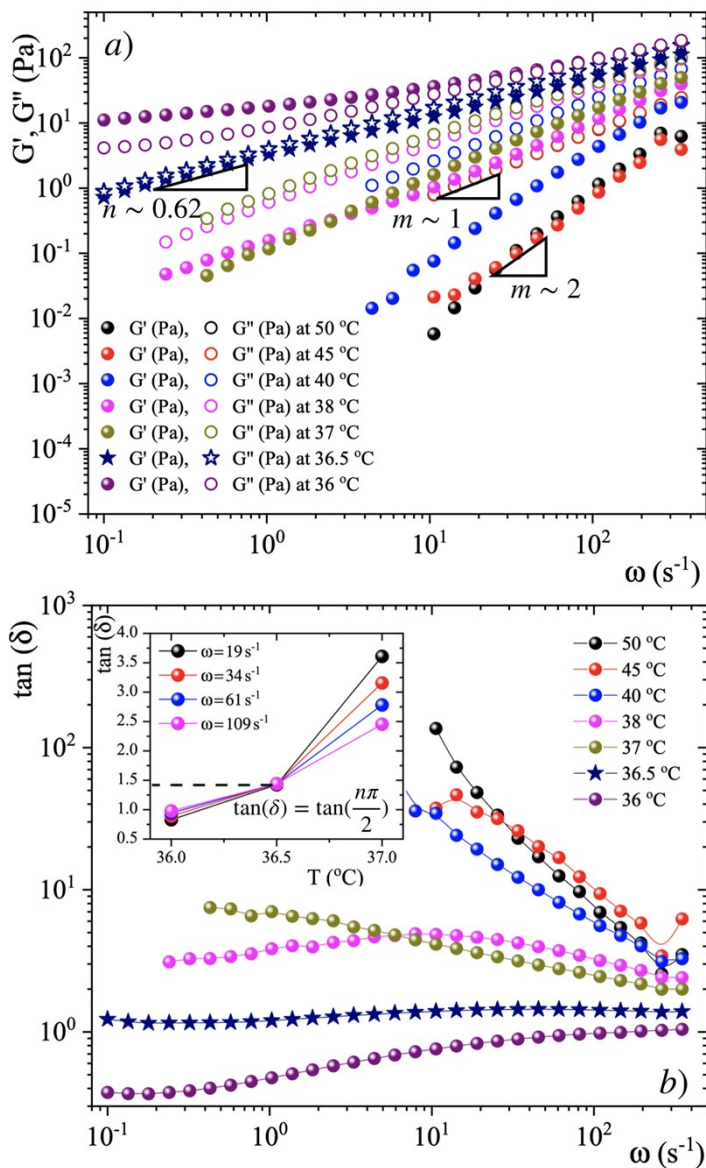

**Figure SI2.** a) Linear viscoelastic spectra (SAOS protocol) at different temperatures for a gelatin solution (16 Wt %) to obtain a physical gel. b)  $\tan(\delta)$  vs.  $\omega$  at different temperatures; inset  $\tan(\delta)$  as a function of the temperature for different frequencies.

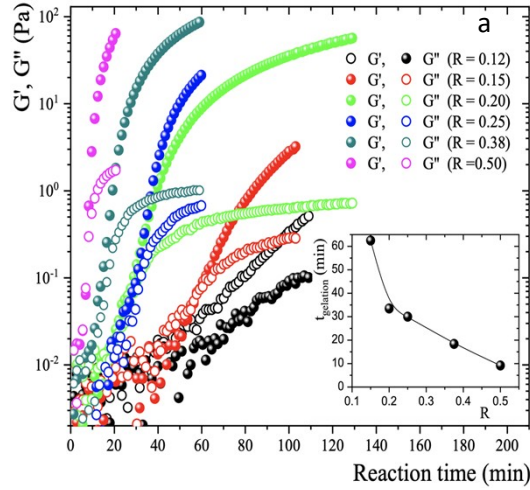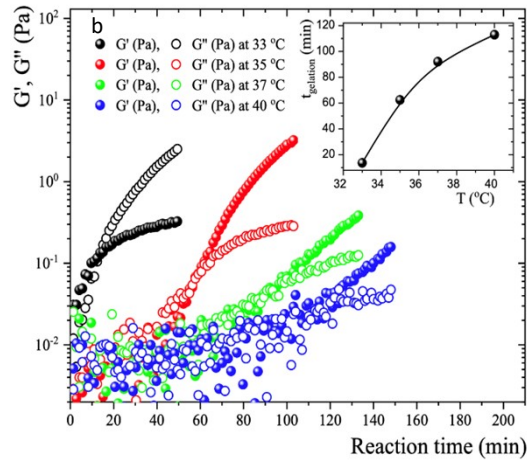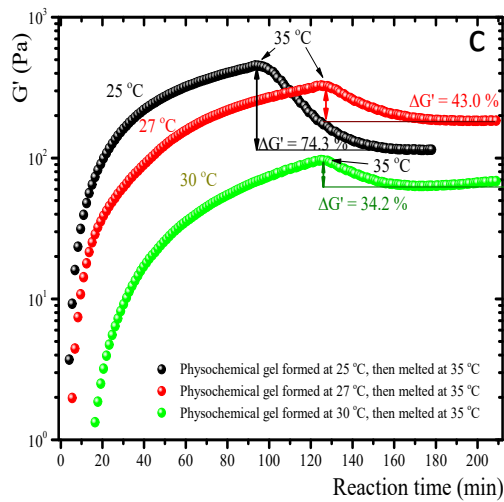

**Figure SI3.** a) Isothermal time sweep curves for a gelatin solution under chemical gelation at  $C = 5 \text{ Wt } \%$  with different  $R$  values at  $35 \text{ }^\circ\text{C}$ . Experiments were performed at  $\omega = 0.5 \text{ s}^{-1}$  and a strain of  $\gamma = 0.8 \%$ . Insert: Gelation time as a function of  $R$ . b) Isothermal time sweep curves for a gelatin solution under chemical gelation at different temperatures with  $C = 5 \text{ Wt } \%$  and  $R = 0.15$ . Insert: Gelation time as a function of the temperature. c) Isothermal time

sweep curves for a gelatin solution under hybrid gelation (5 *Wt* % and  $R = 0.15$ ). The hybrid gel was formed at three different temperatures  $\leq T_g$ , and subsequently, the gel was melted to destroy the triple helices melted at 35 °C (indicated by an arrow), showing the remaining  $G'$  due to the chemical scaffold. As the temperature of hybrid gel formation is lower than  $T_g$ , the  $\Delta G'$  is larger, showing a greater quantity of triple helices than at temperatures closer to  $T_g$ .

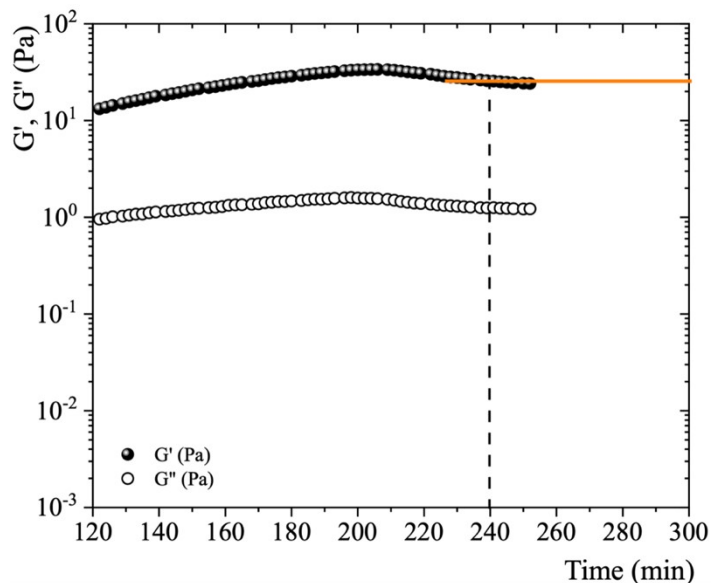

**Figure SI4.** Isothermal sweep curves for physical gelatin gels with 5 *wt* % at  $T = 29$  °C. Experiments were performed at  $\omega = 0.5$   $s^{-1}$  and strain of  $\gamma = 0.8$  %.

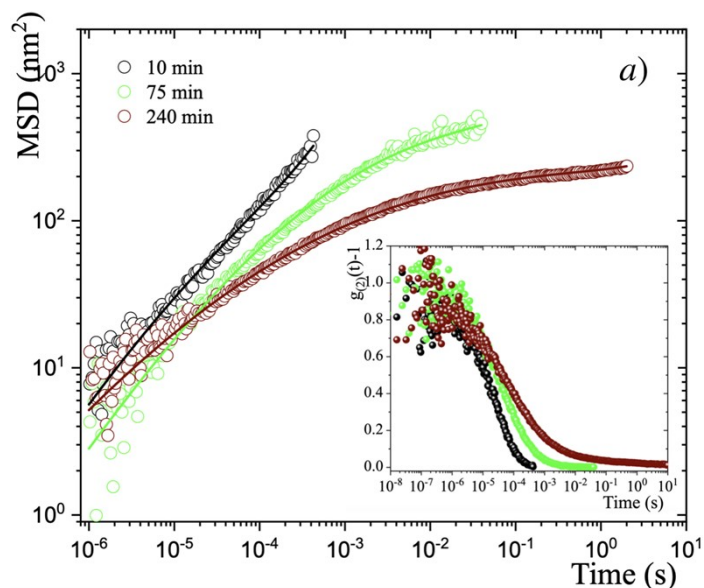

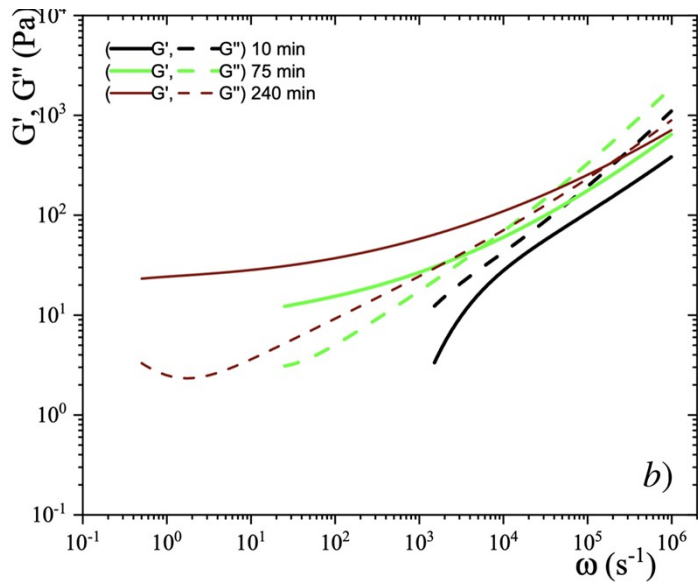

**Figure SI5.** a) MSD vs. time for polystyrene microspheres (*dia.* 500 nm and *vol. fraction* 0.025) embedded in a 5 Wt % gelatin solution three times after quenching to 25 °C. 10 min, 75 min, and 240 min. Open circles correspond to experimental MSD data, and the continuous lines correspond to best fitting using the Bellour *et al.* model.<sup>3</sup> Inset: Intensity correlation functions that produced curves in (a). b) Viscoelastic spectra for different times after quenching temperature (10 min, 75 min, and 240 min) through the generalized Stokes-Einstein relationship<sup>4,5</sup> using the MSD adjusted by Bellour *et al.* model.<sup>3</sup>

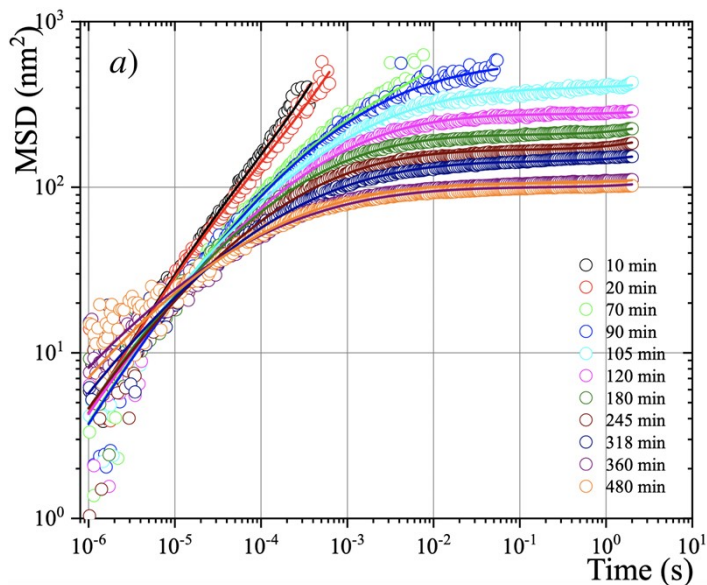

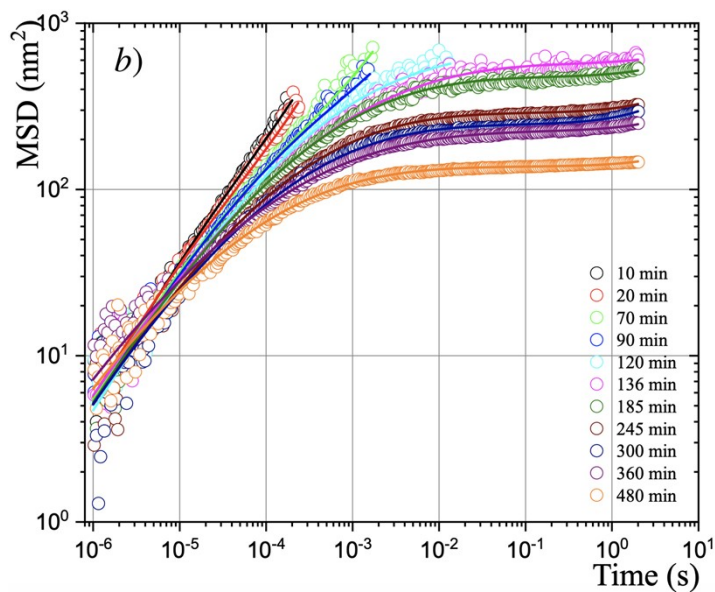

**Figure S16.** *MSD vs. time* for microspheres embedded in gelatin solutions. a) Physicochemical gel formation for  $C = 5 \text{ Wt } \%$  (*dia.* 500 nm and *vol. fraction* 0.025) after adding glutaraldehyde ( $R = 0.15$ ) and simultaneously quenching to 27 °C. b) Physicochemical gel formation for  $C = 5 \text{ Wt } \%$  (*dia.* 500 nm and *vol. fraction* 0.025) after adding glutaraldehyde ( $R = 0.15$ ) and simultaneously quenching to 30 °C. Open circles correspond to experimental MSDs data, and continuous lines correspond to best fitting using the Bellour *et al.* model. <sup>3</sup>

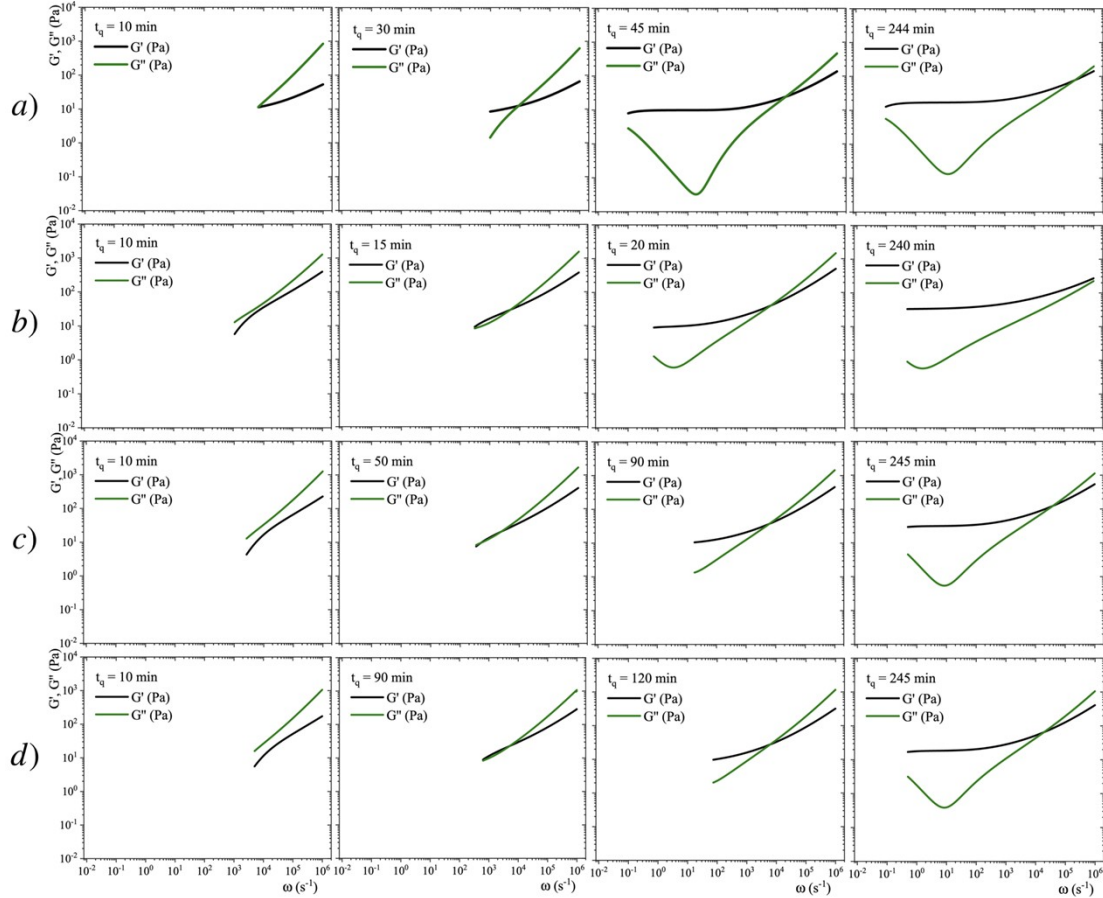

**Figure**

**re S17.** Time evolution of viscoelastic spectra for gelatin solution. a) Chemical gel formation for  $C = 3 \text{ Wt } \%$  at different  $t_q$  after adding glutaraldehyde ( $R = 0.25$ ). Physicochemical gel formation for  $C = 5 \text{ Wt } \%$  at different  $t_q$  after adding glutaraldehyde ( $R = 0.15$ ) and simultaneously quenching: b)  $25 \text{ }^\circ\text{C}$ , c)  $27 \text{ }^\circ\text{C}$ , and c)  $30 \text{ }^\circ\text{C}$ .

## References

- 1 M. Doi, S. F. Edwards and S. F. Edwards, *The Theory of Polymer Dynamics*, Oxford University Press, 1988, vol. 73.
- 2 J. Peyrelasse, M. Lamarque, J. P. Habas and N. El Bounia, *Phys Rev E*, 1996, **53**, 6126–6133.
- 3 M. Bellour, M. Skouri, J.-P. Munch and P. Hébraud, *The European Physical Journal E*, 2002, **8**, 431–436.
- 4 T. G. Mason and D. A. Weitz, *Phys Rev Lett*, 1995, **74**, 1250–1253.
- 5 A. Tavera-Vázquez, N. Rincón-Londoño, R. F. López-Santiago and R. Castillo, *Journal of Physics: Condensed Matter*, 2022, **34**, 034003.
